# Supplementary material
Source: PubMed Central journal article supplement (PMC4528989)
Supplement: Supp_Table1.pdf [file Supp_Table1.pdf]

## Supplementary Data

**Supplementary Table 1. Item Factor Loadings and Construct Summary Statistics of the PEAS Instrument in our Study Population<sup>a</sup> (n = 301)**

| PEAS Items                                                                                                                                      | Parenting practices |            |                               |                              |                 |               |
|-------------------------------------------------------------------------------------------------------------------------------------------------|---------------------|------------|-------------------------------|------------------------------|-----------------|---------------|
|                                                                                                                                                 | Monitoring          | Discipline | Limit setting of screen media | Limit setting of soda/snacks | Pressure to eat | Reinforcement |
| How often do you supervise sweets (candy, ice cream, cakes) that your child eats?                                                               | 0.70                |            |                               |                              |                 |               |
| How often do you supervise the salty snack foods (French fries, Doritos) your child eats?                                                       | 0.77                |            |                               |                              |                 |               |
| How often do you supervise the high-fat foods your child eats?                                                                                  | 0.74                |            |                               |                              |                 |               |
| How often do you supervise the amount of TV or videos your child is watching?                                                                   | 0.61                |            |                               |                              |                 |               |
| How often do you supervise the amount of exercise your child is getting?                                                                        | 0.59                |            |                               |                              |                 |               |
| How often do you supervise the servings of fruits and vegetables your child is eating?                                                          | 0.64                |            |                               |                              |                 |               |
| How often do you discipline your child if she/he watches TV or videos without asking for permission?                                            |                     | 0.80       |                               |                              |                 |               |
| How often do you discipline your child if she/he plays video games or is on the computer without asking for permission?                         |                     | 0.80       |                               |                              |                 |               |
| How often do you discipline your child if she/he gets a snack without asking for permission?                                                    |                     | 0.76       |                               |                              |                 |               |
| How often do you discipline your child if she/he drinks soda without asking for permission?                                                     |                     | 0.73       |                               |                              |                 |               |
| I limit the amount of time my child watches TV or videos during the week (Mon–Fri).                                                             |                     |            | 0.74                          |                              |                 |               |
| I limit the amount of time my child watches TV or videos during the weekend (Sat–Sun).                                                          |                     |            | 0.82                          |                              |                 |               |
| I limit the amount of time my child plays video games (like Game Boy, Sega, or PlayStation) or is on the computer during the week (Mon–Fri).    |                     |            | 0.72                          |                              |                 |               |
| I limit the amount of time my child plays video games (like Game Boy, Sega, or PlayStation) or is on the computer during the weekend (Sat–Sun). |                     |            | 0.84                          |                              |                 |               |
| I limit the amount of soda my child drinks.                                                                                                     |                     |            |                               | 0.69                         |                 |               |
| I limit the amount of snacks my child eats.                                                                                                     |                     |            |                               | 0.69                         |                 |               |
| My child must ask permission before getting a snack.                                                                                            |                     |            |                               | 0.64                         |                 |               |
| My child must ask permission before drinking a soda.                                                                                            |                     |            |                               | 0.60                         |                 |               |

*continued on page 2*

**Supplementary Table 1. Item Factor Loadings and Construct Summary Statistics of the PEAS Instrument in our Study Population<sup>a</sup> (n = 301) continued**

| PEAS Items                                                        | Parenting practices |             |                               |                              |                 |               |
|-------------------------------------------------------------------|---------------------|-------------|-------------------------------|------------------------------|-----------------|---------------|
|                                                                   | Monitoring          | Discipline  | Limit setting of screen media | Limit setting of soda/snacks | Pressure to eat | Reinforcement |
| I offer sweets as a reward for good behaviors. <sup>b</sup>       |                     |             |                               |                              | 0.48            |               |
| My child should always eat all the food on his/her plate.         |                     |             |                               |                              | 0.71            |               |
| I have to make sure my child eats enough.                         |                     |             |                               |                              | 0.56            |               |
| If my child says I'm not hungry I try to get them to eat anyway.  |                     |             |                               |                              | 0.71            |               |
| If I don't regulate my child's eating he/she would eat much less. |                     |             |                               |                              | 0.61            |               |
| I offer TV, video games, videos as a reward for good behavior.    |                     |             |                               |                              | 0.54            |               |
| How often do you praise your child for eating a healthy snack?    |                     |             |                               |                              |                 | 0.80          |
| How often do you praise your child for being physically active?   |                     |             |                               |                              |                 | 0.79          |
| Summary statistics                                                |                     |             |                               |                              |                 |               |
| Eigenvalues                                                       | 7.69                | 2.56        | 1.85                          | 1.53                         | 1.34            | 1.23          |
| Proportion of variance                                            | 0.30                | 0.10        | 0.07                          | 0.06                         | 0.05            | 0.05          |
| Cronbach's alpha                                                  | 0.85                | 0.87        | 0.86                          | 0.74                         | 0.67            | 0.80          |
| Mean (SD)                                                         | 3.74 (0.96)         | 3.34 (1.28) | 3.54 (1.23)                   | 3.93 (1.02)                  | 2.61 (0.90)     | 3.74 (1.28)   |

<sup>a</sup>

<sup>b</sup>PEAS, Parenting Strategies for Eating and Activity Scale; TV, television; SD, standard deviation.
