# Supplementary material
Source: PubMed Central journal article supplement (PMC4528989)
Supplement: Supp_Table2.pdf [file Supp_Table2.pdf]

**Supplementary Table 2. Constructs and Summary Statistics of the Home Environment (n = 299)**

| Measure                                      | Items (response scale)                                                                                                                                                                                                                                                                                                                                                               | Summary statistic                |            |
|----------------------------------------------|--------------------------------------------------------------------------------------------------------------------------------------------------------------------------------------------------------------------------------------------------------------------------------------------------------------------------------------------------------------------------------------|----------------------------------|------------|
|                                              |                                                                                                                                                                                                                                                                                                                                                                                      | Category                         | n (%)      |
| Availability of fruits and vegetables        | How often would you say fruits and vegetables are available in your home? (always, usually, sometimes, never)                                                                                                                                                                                                                                                                        | Low (never/sometimes)            | 111 (37.1) |
|                                              | How often are vegetables served at dinner? (always, usually, sometimes, never)<br>How often is fruit served at dinner? (always, usually, sometimes, never)                                                                                                                                                                                                                           | High (usually/always)            | 188 (62.9) |
| Availability of sugar-sweetened beverages    | How often is juice (like apple or orange) served at meals in your home? (always, usually, sometimes, never)                                                                                                                                                                                                                                                                          | Low (never/sometimes)            | 232 (77.6) |
|                                              | How often are other drinks (like ice tea, lemonade, fruit punch, Kool-Aid, Capri Sun, Sunny Delight, Snapple, Gatorade, Vitamin Water) served at meals in your home? (always, usually, sometimes, never)<br>How often is regular soda served at meals in your home? (always, usually, sometimes, never)                                                                              | High (usually/always)            | 67 (22.4)  |
| Frequency of family meals                    | How many times does your family sit down together for dinner? (never, once per month, 2–3 times per month, 1–3 times per week, ≥4 times per week)                                                                                                                                                                                                                                    | Less frequent (≤2–3 times/month) | 69 (23.1)  |
|                                              |                                                                                                                                                                                                                                                                                                                                                                                      | More frequent (≥1–3 times/week)  | 230 (76.9) |
| Frequency of TV watching during family meals | How many times does your family have meals in front of the TV? (never, once per month, 2–3 times per month, 1–3 times per week, ≥4 times per week)                                                                                                                                                                                                                                   | Less frequent (≤2–3 times/month) | 159 (53.2) |
|                                              |                                                                                                                                                                                                                                                                                                                                                                                      | More frequent (≥1–3 times/week)  | 140 (46.8) |
| Number of TVs at home                        | How many TVs do you have at home? (open-ended)                                                                                                                                                                                                                                                                                                                                       | Low (1–2 TVs)                    | 169 (56.5) |
|                                              |                                                                                                                                                                                                                                                                                                                                                                                      | High (3–6 TVs)                   | 130 (43.5) |
| TV in child's bedroom                        | Is there a TV in your child's bedroom? (yes/no)                                                                                                                                                                                                                                                                                                                                      | No                               | 79 (26.4)  |
|                                              |                                                                                                                                                                                                                                                                                                                                                                                      | Yes                              | 220 (73.6) |
| Own active video games <sup>a</sup>          | Does your child or someone else at home have active video games (like Dance Dance Revolution, Wii, etc.)? (yes/no)                                                                                                                                                                                                                                                                   | No                               | 129 (43.4) |
|                                              |                                                                                                                                                                                                                                                                                                                                                                                      | Yes                              | 168 (56.6) |
| Own sports equipment <sup>a</sup>            | Does your child or someone else at home have sports equipment (balls, rackets, bats, sticks)? (yes/no)                                                                                                                                                                                                                                                                               | No                               | 113 (38.1) |
|                                              |                                                                                                                                                                                                                                                                                                                                                                                      | Yes                              | 184 (61.9) |
| Household food security                      | The food we bought just didn't last, and we didn't have the money to get more. (often true/sometimes true/never true)<br>We couldn't afford to eat balanced meals. (often true/sometimes true/never true)<br>In the last 12 months, did you or other adults in your household ever cut the size of your meals or skip meals because there wasn't enough money for food? (yes/no) (4) | Food secure                      | 184 (61.5) |
|                                              | If yes, how often did this happen? (almost every month, some months but not every month, only 1 or 2 months)<br>In the last 12 months, did you ever eat less than you felt you should because there wasn't enough money to buy food? (yes/no)<br>In the last 12 months, were you ever hungry but didn't eat because you couldn't afford enough food? (yes/no)                        | Food insecure                    | 115 (38.5) |

<sup>a</sup>n = 297 for own active video games and own sports equipment; 2 missing owing to nonresponses. TV, television.
